# Supplementary material
Source: HighWire-hosted journal article supplement (https://bmjopen.bmj.com/content/9/8/e031550)
Supplement: inline-supplementary-material-1 [file inline-supplementary-material-1.pdf]

## Supplemental Material

### Supplemental Material TOC:

- Definition of confounders and other measured covariates
- Early- and moderate-stage CKD
- ICD-10 codes identifying CKD
- Supplemental Table 1
- Supplemental Table 2
- Supplemental Figure 1

#### Definition of Confounders and Other Measured Covariates

The covariates were based on Read codes recorded in CPRD any time prior to index date. In addition, hypertension and obesity were also based on the following recorded values:

- Hypertension: blood pressure  $\geq 140/90$  mm Hg
- Obesity: body mass index  $\geq 30$  kg/m<sup>2</sup>

Early- and moderate-stage CKD were defined in the following ways:

- Early-stage CKD: if a diagnosis code for stage 1 or 2 CKD was present or eGFR was  $\geq 60$  ml/min/1.73m<sup>2</sup> during the 12 months before index date
- Moderate-stage CKD: if there was a diagnosis code for stage 3 or 4 CKD or eGFR was 15-59 ml/min/1.73m<sup>2</sup> during the 12 months before index date

For patients with  $\geq 1$  serum creatinine measurement recorded during the 12 months before index date, the closest measurement to index date was used to estimate eGFR and classify patients according to GFR category.

ICD-10 codes identifying CKD used in determination of death associated with CKD:

- E10.2, E11.2, E13.2, E14.2, I12.0, I13.0, I13.1, I13.2, I13.9, N17.0, N17.1, N17.2, N17.8, N17.9, N18.0, N18.5, N19.X, N99.0, O08.4, O90.4

**Supplemental Table 1.** Demographic and clinical characteristics of patients with and without gout – final study population

|                                                             | Study Population | Patients With Gout | Patients Without Gout |
|-------------------------------------------------------------|------------------|--------------------|-----------------------|
|                                                             | (N=623,861)      | (n=68,897)         | (n=554,964)           |
| <b>Demographic characteristics:</b>                         |                  |                    |                       |
| Age at index date (yr)                                      |                  |                    |                       |
| Median (IQR)                                                | 60 (48-71)       | 62 (50-73)         | 59 (48-70)            |
| Sex (%) <sup>a</sup>                                        |                  |                    |                       |
| Male                                                        | 76.8             | 76.7               | 77.1                  |
| Female                                                      | 23.2             | 23.3               | 22.9                  |
| <b>Townsend score of social deprivation (%)<sup>a</sup></b> |                  |                    |                       |
| 1 (most affluent)                                           | 24.4             | 24.7               | 24.4                  |
| 2                                                           | 24.4             | 24.88              | 24.4                  |
| 3                                                           | 21.2             | 21.7               | 21.2                  |
| 4                                                           | 18.5             | 18.1               | 18.5                  |
| 5 (least affluent)                                          | 11.5             | 10.7               | 11.5                  |
| <b>Comorbid conditions, No. (%):</b>                        |                  |                    |                       |
| Diabetes mellitus                                           | 51,148 (8.2)     | 7661 (11.1)        | 43 487 (7.8)          |
| Chronic obstructive pulmonary disease                       | 24,702 (4.0)     | 3580 (5.2)         | 21,122 (3.8)          |
| Hypertension                                                | 175,240 (28.1)   | 31,967 (46.4)      | 143,273 (25.8)        |
| Hyperlipidemia                                              | 63,902 (10.2)    | 10,899 (15.8)      | 53,003 (9.6)          |
| Obesity                                                     | 25,485 (4.1)     | 5550 (8.1)         | 19,935 (3.6)          |
| <b>Cardiovascular Conditions</b>                            |                  |                    |                       |
| Myocardial infarction                                       | 26,874 (4.3)     | 4991 (7.2)         | 21,883 (3.9)          |
| Angina                                                      | 41,554 (6.7)     | 7665 (11.1)        | 33,889 (6.1)          |
| Heart failure                                               | 17,850 (2.9)     | 5264 (7.6)         | 12,586 (2.3)          |
| Ischemic heart disease                                      | 64,023 (10.3)    | 11,682 (17.0)      | 52,341 (9.4)          |
| Peripheral vascular disease                                 | 19,094 (3.1)     | 3179 (4.6)         | 15,915 (2.9)          |
| Stroke                                                      | 18,752 (3.0)     | 2807 (4.1)         | 15,945 (2.9)          |
| Transient ischemic attack                                   | 14,106 (2.3)     | 2360 (3.4)         | 11,746 (2.1)          |

|                                                   |                |               |                |
|---------------------------------------------------|----------------|---------------|----------------|
| History of CKD                                    |                |               |                |
| Stage 1 CKD <sup>b</sup>                          | 38,776 (6.2)   | 5725 (8.3)    | 33,051 (6.0)   |
| Stage 2 CKD <sup>b</sup>                          | 117,295 (18.8) | 17,435 (25.3) | 99,860 (18.0)  |
| Stage 3 CKD <sup>b</sup>                          | 67,238 (10.8)  | 16,026 (23.3) | 51,212 (9.2)   |
| Stage 4 CKD <sup>b</sup>                          | 6969 (1.1)     | 2891 (4.2)    | 4078 (0.7)     |
| Other Renal Diagnosis                             |                |               |                |
| General renal disease                             | 7944 (1.3)     | 2594 (3.8)    | 5350 (1.0)     |
| Nephrolithiasis                                   | 8781 (1.4)     | 1349 (2.0)    | 7432 (1.3)     |
| Acute kidney injury                               | 720 (0.1)      | 200 (0.3)     | 520 (0.1)      |
| Prostatic hypertrophy                             | 21,436 (3.4)   | 2946 (4.3)    | 18,490 (3.3)   |
| Other Diagnosis                                   |                |               |                |
| Liver failure/disease                             | 5398 (0.9)     | 866 (1.3)     | 4532 (0.8)     |
| Peptic ulcer disease                              | 93,133 (14.9)  | 12,855 (18.7) | 80,278 (14.5)  |
| Rheumatological disease                           | 132,302 (21.2) | 21,049 (30.6) | 111,253 (20.1) |
| Depression                                        | 91,379 (14.7)  | 10,459 (15.2) | 80,920 (14.6)  |
| Dementia                                          | 5661 (0.9)     | 286 (0.4)     | 5375 (1.0)     |
| Charlson Comorbidity Index at index date, No. (%) |                |               |                |
| 0                                                 | 141,266 (22.6) | 12,539 (18.2) | 128,727 (23.2) |
| 1                                                 | 133,780 (21.4) | 12,972 (18.8) | 120,808 (21.8) |
| 2                                                 | 119,633 (19.2) | 12,105 (17.6) | 107,528 (19.4) |
| 3                                                 | 96,017 (15.4)  | 10,413 (15.1) | 85,604 (15.4)  |
| 4                                                 | 63,780 (10.2)  | 7900 (11.5)   | 55,880 (10.1)  |
| 5                                                 | 34,620 (5.6)   | 5344 (7.8)    | 29,276 (5.3)   |
| ≥6                                                | 34,765 (5.6)   | 7624 (11.1)   | 27,141 (4.9)   |
| Lifestyle traits:                                 |                |               |                |
| Smoking status, No. (%)                           |                |               |                |
| Current smoker                                    | 136,753 (24.6) | 11,343 (17.5) | 125,410 (25.6) |
| Former smoker                                     | 169,717 (30.6) | 24,625 (38.0) | 145,092 (29.6) |
| Never smoker                                      | 248,725 (44.8) | 28,842 (44.5) | 219,883 (44.8) |
| Unknown status                                    | 68,666 (N/A)   | 4087 (N/A)    | 64,579 (N/A)   |
| Drug and alcohol use, No. (%)                     |                |               |                |
| History of alcohol use                            | 16,133 (2.6)   | 2591 (3.8)    | 13,542 (2.4)   |
| History of drug addiction                         | 4805 (0.8)     | 374 (0.5)     | 4431 (0.8)     |
| Therapy information:                              |                |               |                |

|                                           |                |               |                |
|-------------------------------------------|----------------|---------------|----------------|
| Drugs related to gout treatment, No. (%)  |                |               |                |
| ULT                                       | 9290 (1.5)     | 9290 (13.5)   | 0 (0.0)        |
| Allopurinol                               | 9239 (1.5)     | 9239 (13.4)   | 0 (0.0)        |
| Febuxostat                                | 0 (0.0)        | 0 (0.0)       | 0 (0.0)        |
| Probenecid                                | 147 (0.0)      | 147 (0.2)     | 0 (0.0)        |
| Benzbromarone                             | 0 (0.0)        | 0 (0.0)       | 0 (0.0)        |
| Sulfinpyrazone                            | 38 (0.0)       | 38 (0.1)      | 0 (0.0)        |
| Nonsteroidal anti-inflammatory drug       | 308,955 (49.5) | 50,350 (73.1) | 258,605 (46.6) |
| Colchicine                                | 4418 (0.7)     | 3762 (5.5)    | 656 (0.1)      |
| Oral corticosteroid                       | 65,274 (10.5)  | 10,397 (15.1) | 54,877 (9.9)   |
| Interleukin 1 receptor antagonist         | 0 (0.0)        | 0 (0.0)       | 0 (0.0)        |
| Drugs related to kidney function, No. (%) |                |               |                |
| Renin angiotensin therapy                 | 129,420 (20.8) | 25,508 (37.0) | 103,912 (18.7) |
| Angiotensin receptor blocker              | 33,121 (5.3)   | 6887 (10.0)   | 26,234 (4.7)   |
| Angiotensin converting enzyme inhibitor   | 118,828 (19.1) | 23,728 (34.4) | 95,100 (17.1)  |
| Beta blocker                              | 133,651 (21.4) | 24,847 (36.1) | 108,804 (19.6) |
| Thiazide diuretic                         | 116,671 (18.7) | 22,889 (33.2) | 93,782 (16.9)  |
| Other diuretic                            | 78,112 (12.5)  | 17,826 (25.9) | 60,286 (10.9)  |
| Other drugs, No. (%)                      |                |               |                |
| Statin                                    | 118,180 (18.9) | 19,551 (28.4) | 98,629 (17.8)  |
| Aspirin                                   | 122,176 (19.6) | 20,123 (29.2) | 102,053 (18.4) |
| Warfarin                                  | 25,352 (4.1)   | 6107 (8.9)    | 19,245 (3.5)   |

Abbreviations: CKD, chronic kidney disease; IQR, interquartile range; N/A, not applicable; ULT, urate lowering therapy.

Note. The study population includes both the gout and nongout cohorts. 28,435 patients were included in both cohorts (as matched nongout patients who subsequently developed gout became gout patients); information is provided on both exposures according to the different index dates.

<sup>a</sup> For the patients included in both cohorts, sex and Townsend score are reported once as they do not vary between being a nongout and a gout patient.

<sup>b</sup> Early-stage CKD defined as either a Read code for stage 1 or 2 CKD or an eGFR in the 12 months prior to study index date  $\geq 60$  ml/min (calculated using Chronic Kidney Disease Epidemiology Collaborative equation). Moderate-stage CKD defined as either a Read code for stage 3 or 4 CKD or an eGFR in the 12 months prior to study index date between 30 and 59 ml/min.

Note. Patients with stage 5 CKD were excluded from the study.

**Supplemental Table 2.** Demographic and clinical characteristics of patients with and without gout – original cohort prior to exclusions for no linked HES or ONS data available

|                                                       | Study Population | Patients With Gout | Patients Without Gout |
|-------------------------------------------------------|------------------|--------------------|-----------------------|
|                                                       | (N=1,012,471)    | (n=112,009)        | (n=900,462)           |
| <b>Demographic characteristics:</b>                   |                  |                    |                       |
| Age at index date (yr)                                |                  |                    |                       |
| Median (IQR)                                          | 59 (48-70)       | 62 (50-73)         | 59 (48-70)            |
| Sex (%) <sup>a</sup>                                  |                  |                    |                       |
| Male                                                  | 76.6             | 76.5               | 76.9                  |
| Female                                                | 23.4             | 23.5               | 23.1                  |
| Townsend score of social deprivation (%) <sup>a</sup> |                  |                    |                       |
| 1 (most affluent)                                     | 24.4             | 24.7               | 24.4                  |
| 2                                                     | 24.4             | 24.8               | 24.4                  |
| 3                                                     | 21.2             | 21.7               | 21.2                  |
| 4                                                     | 18.5             | 18.1               | 18.5                  |
| 5 (least affluent)                                    | 11.5             | 10.7               | 11.5                  |
| <b>Comorbid conditions, No. (%):</b>                  |                  |                    |                       |
| Diabetes mellitus                                     | 82,724 (8.2)     | 12,396 (11.1)      | 70,328 (7.8)          |
| Chronic obstructive pulmonary disease                 | 40,486 (4.0)     | 5790 (5.2)         | 34,696 (3.9)          |
| Hypertension                                          | 283,854 (28.0)   | 52,156 (46.6)      | 231,698 (25.7)        |
| Hyperlipidemia                                        | 105,748 (10.4)   | 18,248 (16.3)      | 87,500 (9.7)          |
| Obesity                                               | 44,288 (4.4)     | 9520 (8.5)         | 34,768 (3.9)          |
| <b>Cardiovascular Conditions</b>                      |                  |                    |                       |
| Myocardial infarction                                 | 44,320 (4.4)     | 8286 (7.4)         | 36,034 (4.0)          |
| Angina                                                | 68,399 (6.8)     | 12,649 (11.3)      | 55,750 (6.2)          |
| Heart failure                                         | 29,266 (2.9)     | 8733 (7.8)         | 20,533 (2.3)          |
| Ischemic heart disease                                | 106,041 (10.5)   | 19,408 (17.3)      | 86,633 (9.6)          |
| Peripheral vascular disease                           | 31,696 (3.1)     | 5320 (4.8)         | 26,376 (2.9)          |
| Stroke                                                | 30,851 (3.1)     | 4759 (4.3)         | 26,092 (2.9)          |
| Transient ischemic attack                             | 23,099 (2.3)     | 3900 (3.5)         | 19,199 (2.1)          |
| <b>History of CKD</b>                                 |                  |                    |                       |
| Stage 1 CKD <sup>b</sup>                              | 62,790 (6.2)     | 9293 (8.3)         | 53,497 (5.9)          |
| Stage 2 CKD <sup>b</sup>                              | 182,089 (18.0)   | 27,197 (24.3)      | 154,892 (17.2)        |
| Stage 3 CKD <sup>b</sup>                              | 104,438 (10.3)   | 25,030 (22.4)      | 79,408 (8.8)          |

|                                                      |                |               |                |
|------------------------------------------------------|----------------|---------------|----------------|
| Stage 4 CKD <sup>b</sup>                             | 10,969 (1.1)   | 4607 (4.1)    | 6362 (0.7)     |
| Other Renal Diagnosis                                |                |               |                |
| General renal disease                                | 13,033 (1.3)   | 4288 (3.8)    | 8745 (1.0)     |
| Nephrolithiasis                                      | 14,734 (1.5)   | 2329 (2.1)    | 12,405 (1.4)   |
| Acute kidney injury                                  | 1246 (0.1)     | 354 (0.3)     | 892 (0.1)      |
| Prostatic hypertrophy                                | 32,984 (3.3)   | 4477 (4.0)    | 28,507 (3.2)   |
| Other Diagnosis                                      |                |               |                |
| Liver failure/disease                                | 8866 (0.9)     | 1386 (1.2)    | 7480 (0.8)     |
| Peptic ulcer disease                                 | 157,453 (15.6) | 21,695 (19.4) | 135,758 (15.1) |
| Rheumatological disease                              | 216,103 (21.3) | 34,463 (30.8) | 181,640 (20.2) |
| Depression                                           | 147,567 (14.6) | 17,004 (15.2) | 130,563 (14.5) |
| Dementia                                             | 9111 (0.9)     | 493 (0.4)     | 8618 (1.0)     |
| Charlson Comorbidity Index at index date,<br>No. (%) |                |               |                |
| 0                                                    | 231,893 (22.9) | 20,748 (18.5) | 211,145 (23.5) |
| 1                                                    | 218,334 (21.6) | 21,083 (18.8) | 197,251 (21.9) |
| 2                                                    | 193,110 (19.1) | 19,627 (17.5) | 173,483 (19.3) |
| 3                                                    | 154,830 (15.3) | 16,755 (15.0) | 138,075 (15.3) |
| 4                                                    | 102,337 (10.1) | 12,687 (11.3) | 89,650 (10.0)  |
| 5                                                    | 55,792 (5.5)   | 8691 (7.8)    | 47,101 (5.2)   |
| ≥6                                                   | 56,175 (5.6)   | 12,418 (11.1) | 43,757 (4.9)   |
| Lifestyle traits:                                    |                |               |                |
| Smoking status, No. (%)                              |                |               |                |
| Current smoker                                       | 224,284 (25.0) | 18,578 (17.7) | 205,706 (26.0) |
| Former smoker                                        | 269,868 (30.1) | 39,385 (37.5) | 230,483 (29.1) |
| Never smoker                                         | 402,961 (44.9) | 47,030 (44.8) | 355,931 (44.9) |
| Unknown status                                       | 115,358 (N/A)  | 7016 (N/A)    | 108,342 (N/A)  |
| Drug and alcohol use, No. (%)                        |                |               |                |
| History of alcohol use                               | 29,289 (2.9)   | 4606 (4.1)    | 24,683 (2.7)   |
| History of drug addiction                            | 7912 (0.8)     | 623 (0.6)     | 7289 (0.8)     |
| Therapy information:                                 |                |               |                |
| Drugs related to gout treatment, No. (%)             |                |               |                |
| ULT                                                  | 15,213 (1.5)   | 15,213 (13.6) | 0 (0.0)        |
| Allopurinol                                          | 15,119 (1.5)   | 15,119 (13.5) | 0 (0.0)        |
| Febuxostat                                           | 0 (0.0)        | 0 (0.0)       | 0 (0.0)        |

|                                           |                |               |                |
|-------------------------------------------|----------------|---------------|----------------|
| Probenecid                                | 249 (0.02)     | 249 (0.2)     | 0 (0.0)        |
| Benzbromarone                             | 0 (0.0)        | 0 (0.0)       | 0 (0.0)        |
| Sulfipyrazone                             | 55 (<0.01)     | 55 (0.1)      | 0 (0.0)        |
| Nonsteroidal anti-inflammatory drug       | 507,352 (50.1) | 82,332 (73.5) | 425,020 (47.2) |
| Colchicine                                | 7139 (0.7)     | 6041 (5.4)    | 1098 (0.1)     |
| Oral corticosteroid                       | 104,158 (10.3) | 16,644 (14.9) | 87,514 (9.7)   |
| Interleukin 1 receptor antagonist         | 0 (0.0)        | 0 (0.0)       | 0 (0.0)        |
| Drugs related to kidney function, No. (%) |                |               |                |
| Renin angiotensin therapy                 | 209,858 (20.7) | 41,603 (37.1) | 168,255 (18.7) |
| Angiotensin receptor blocker              | 53,710 (5.3)   | 11,215 (10.0) | 42,495 (4.7)   |
| Angiotensin converting enzyme inhibitor   | 192,293 (19.0) | 38,614 (34.5) | 153,679 (17.1) |
| Beta blocker                              | 218,824 (21.6) | 40,465 (36.1) | 178,359 (19.8) |
| Thiazide diuretic                         | 189,661 (18.7) | 37,584 (33.6) | 152,077 (16.9) |
| Other diuretic                            | 128,155 (12.7) | 29,398 (26.3) | 98,757 (11.0)  |
| Other drugs, No. (%)                      |                |               |                |
| Statin                                    | 193,929 (19.2) | 32,275 (28.8) | 161,654 (18.0) |
| Aspirin                                   | 201,562 (19.9) | 33,078 (29.5) | 168,484 (18.7) |
| Warfarin                                  | 41,394 (4.1)   | 10,042 (9.0)  | 31,352 (3.5)   |

Abbreviations: CKD, chronic kidney disease; eGFR, estimated glomerular filtration rate; HES, Hospital Episode Statistics; IQR, interquartile range; N/A, not applicable; ONS, Office for National Statistics; ULT, urate lowering therapy.

Note. The study population includes both the gout and nongout cohorts. 45,531 patients were included in both cohorts (as matched nongout patients who subsequently developed gout became gout patients); information is provided on both exposures according to the different index dates.

<sup>a</sup> For the patients included in both cohorts, sex and Townsend score are reported once as they do not vary between being a nongout and a gout patient.

<sup>b</sup> Early-stage CKD defined as either a Read code for stage 1 or 2 CKD or an eGFR in the 12 months prior to study index date  $\geq 60$  ml/min (calculated using Chronic Kidney Disease Epidemiology Collaborative equation). Moderate-stage CKD defined as either a Read code for stage 3 or 4 CKD or an eGFR in the 12 months prior to study index date between 30 and 59 ml/min.

Note. Patients with stage 5 CKD were excluded from the study.

**Supplemental Figure 1. Sensitivity analyses illustrating association between gout and advanced chronic kidney disease and its four components, according to study population; main study population, incident gout and propensity score matched patients.**

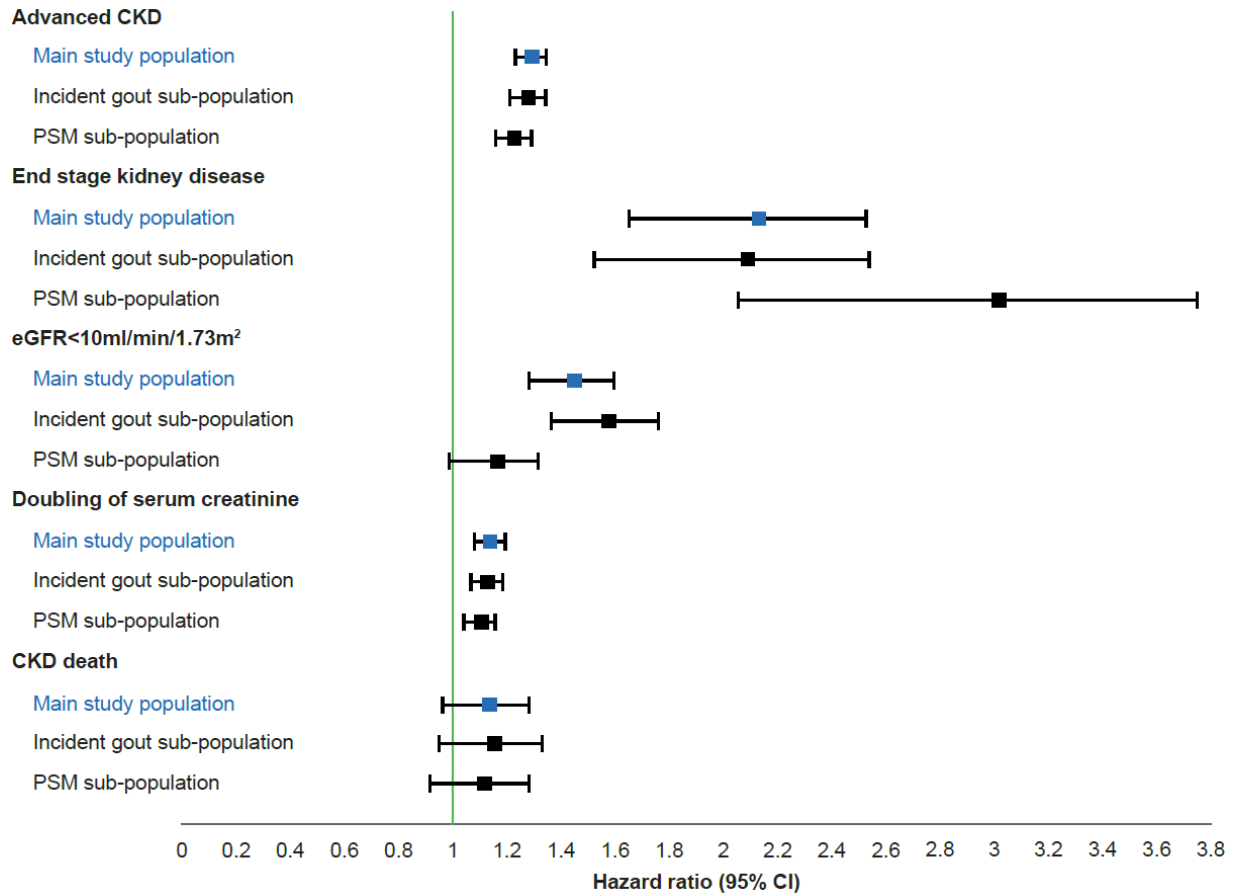

CKD, chronic kidney disease; PSM, propensity score matched; eGFR, estimated glomerular filtration rate; 95% CI, 95% confidence interval.
